# Supplementary material for: Alcohol- and water-soluble bis(tpy)quaterthiophenes with phosphonium side groups: new conjugated units for metallo-supramolecular polymers
Source: Royal Society of Chemistry journal article supplement (doi:10.1039/c5dt04133c), 2015-12-02
Supplement: c5dt04133c1.pdf [file c5dt04133c1.pdf]

## Electronic supplementary information

### Alcohol- and water-soluble bis(*tpy*)quaterthiophenes with phosphonium side groups: new conjugated units for metallo-supramolecular polymers

Pavla Štenclová, Kristýna Šichová, Ivana Šloufová, Jiří Zedník, Jiří Vohlídal\* and Jan Svoboda \*

Charles University in Prague, Faculty of Science, Department of Physical and Macromolecular Chemistry, Hlavova 2030, CZ-128 40, Prague 2, Czech Republic.  
Fax:+420 224919752; Tel:+420 221951310;

E-mail: jan.svoboda@natur.cuni.cz (J. Svoboda)  
jiri.vohlidal@natur.cuni.cz (J. Vohlídal)

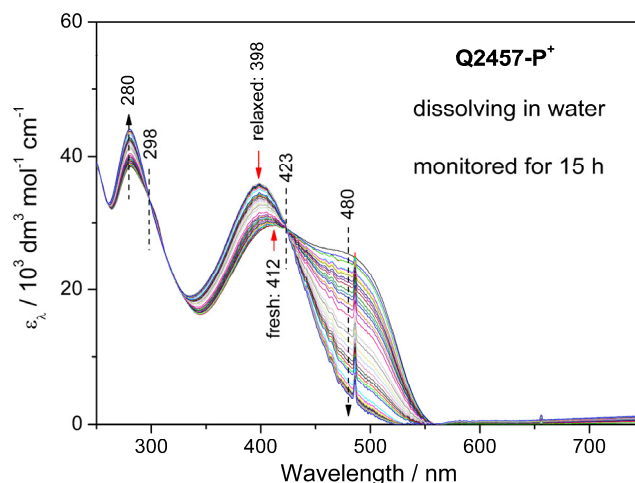

**Figure S1.** Time-development of the UV/vis spectra during the dissolution of **Q2457-P<sup>+</sup>** in water. Room temperature,  $2 \cdot 10^{-5} \text{ M}$

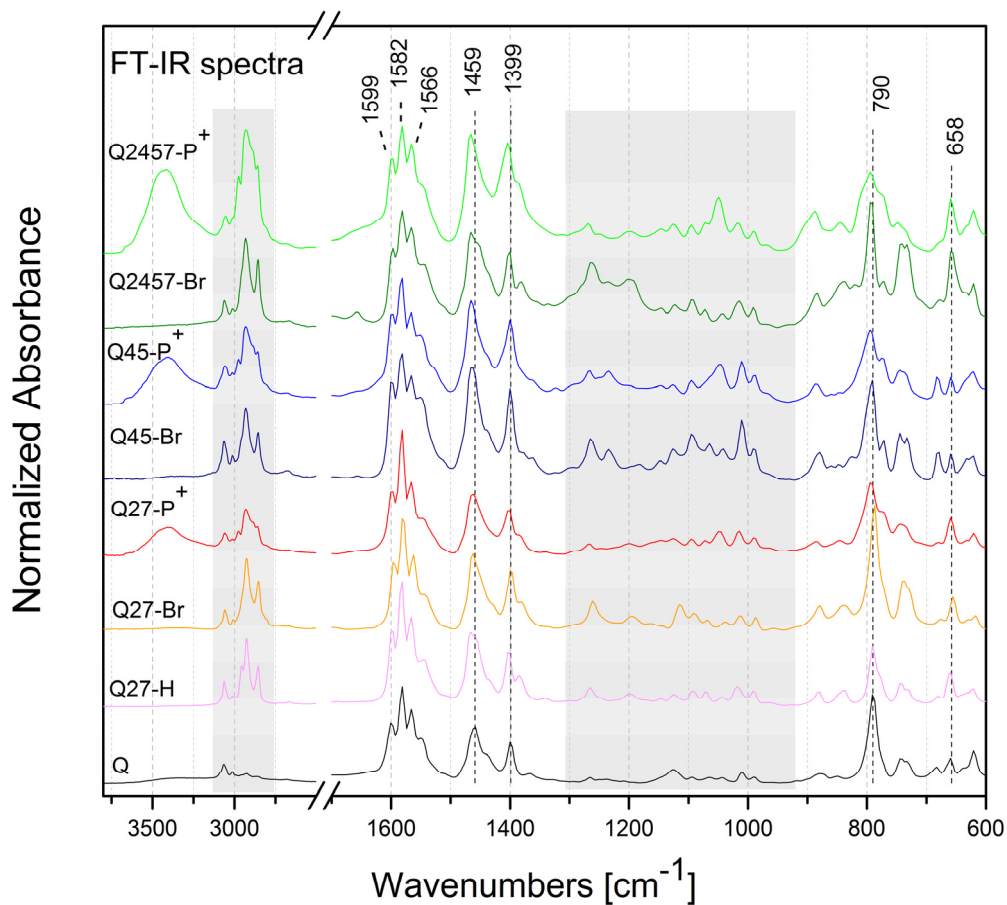

**Figure S2.** Infrared spectra of prepared unimers.

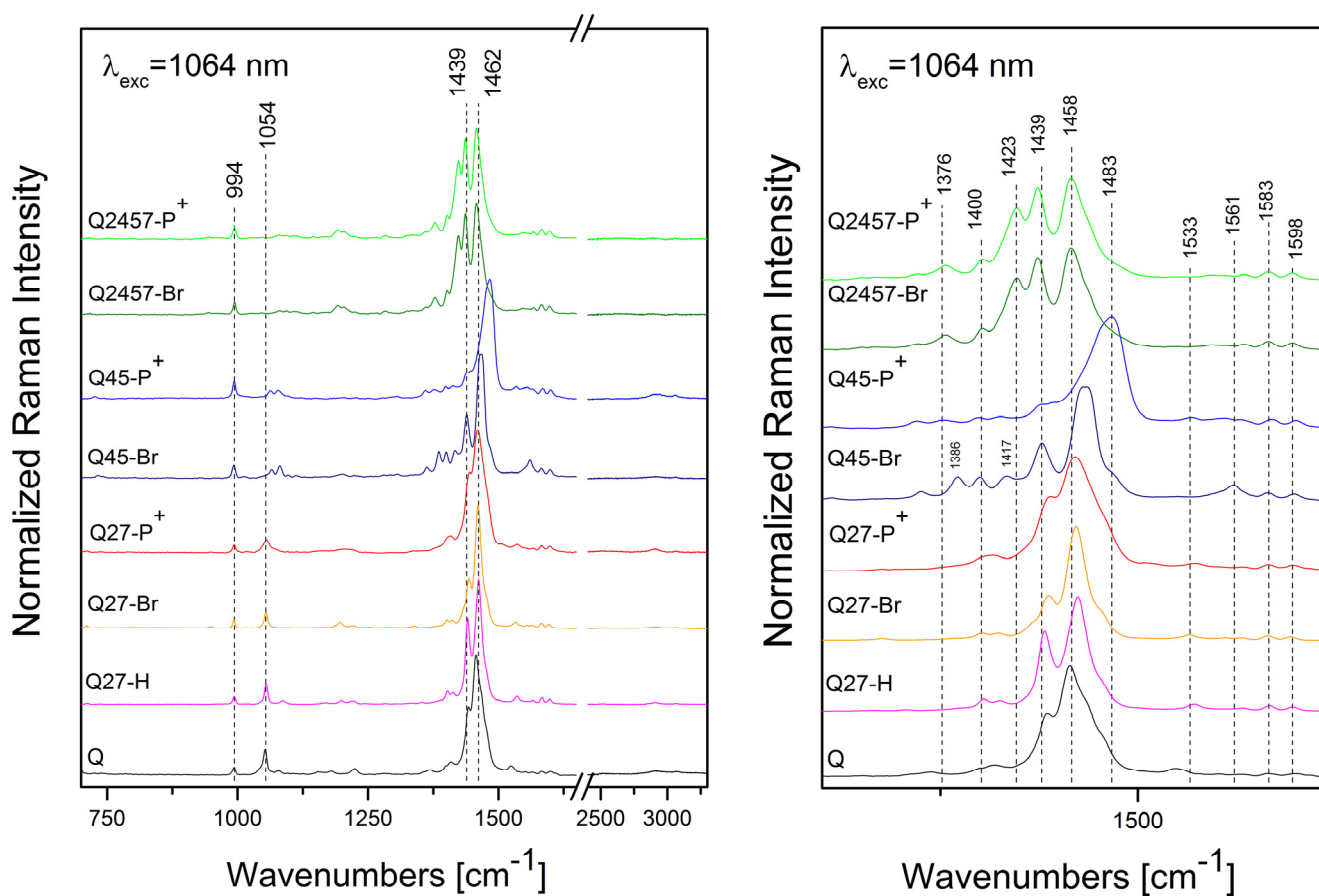

**Figure S3.** Off-resonance Raman spectra of prepared unimers ( $\lambda_{\text{exc}} = 1064 \text{ nm}$ ).

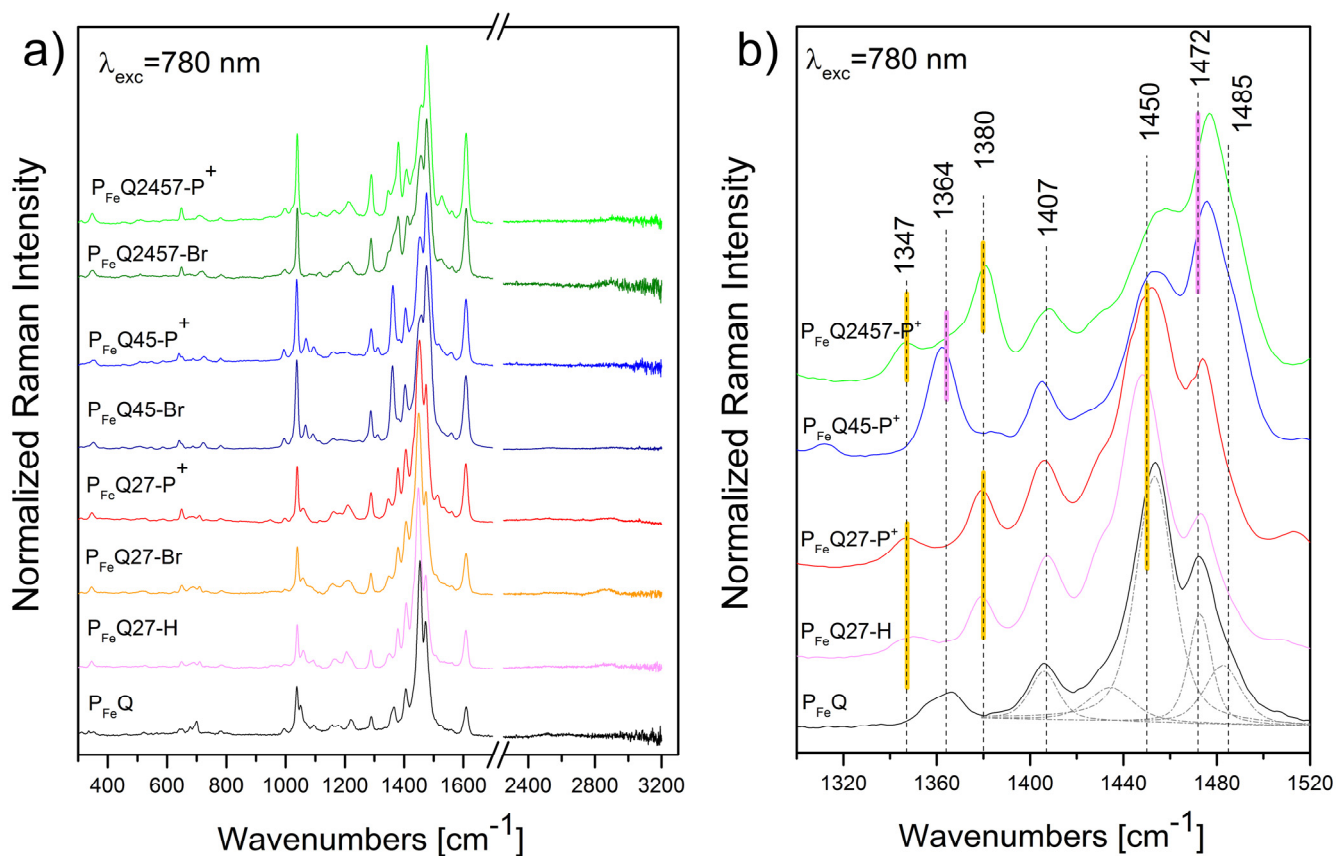

**Figure S4.** Off-resonance Raman spectra of Fe-polymers at  $\lambda_{\text{exc}} = 780$  nm (a) and deconvolution of spectra (b).

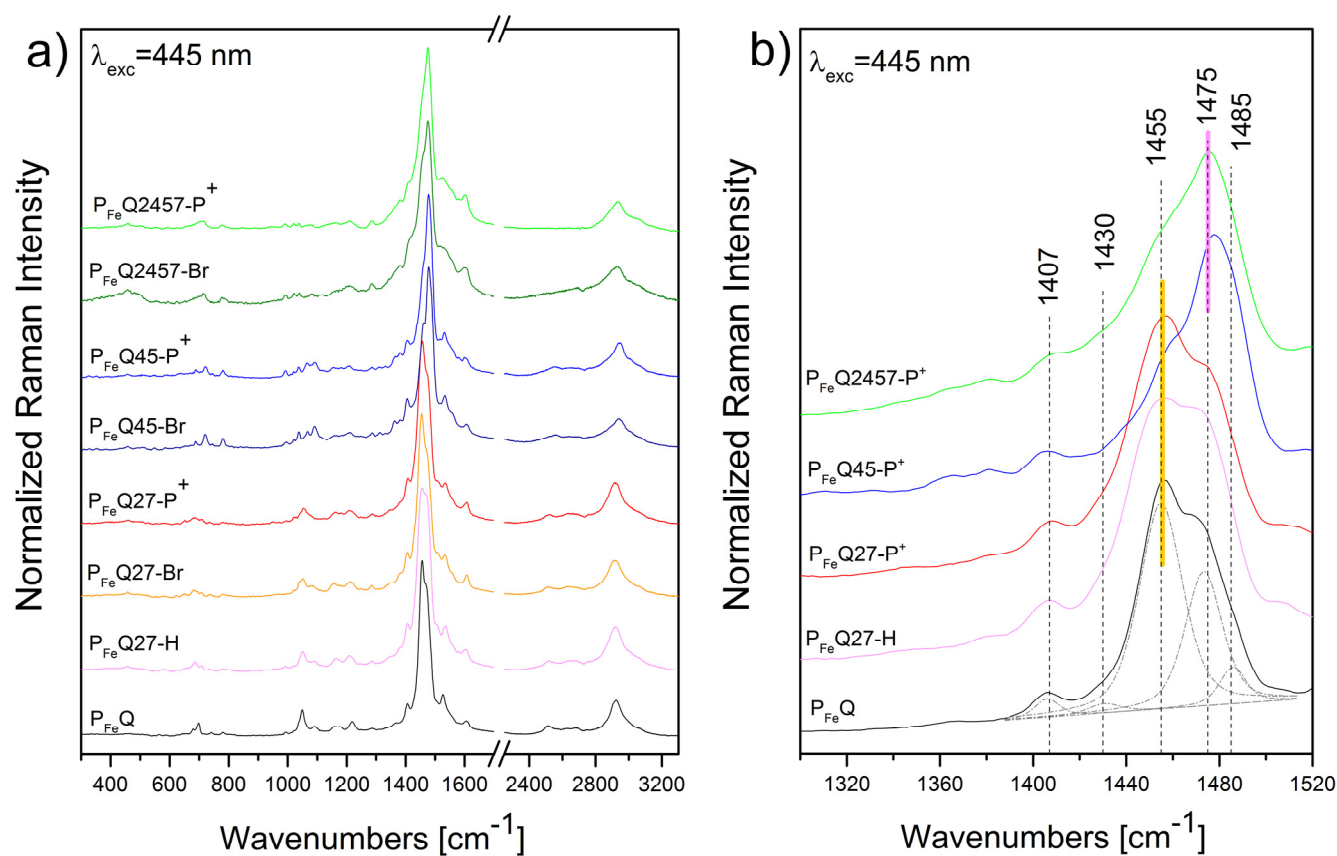

**Figure S5.** Off-resonance Raman spectra of Fe-polymers at  $\lambda_{\text{exc}} = 445$  nm (a) and deconvolution of spectra (b).

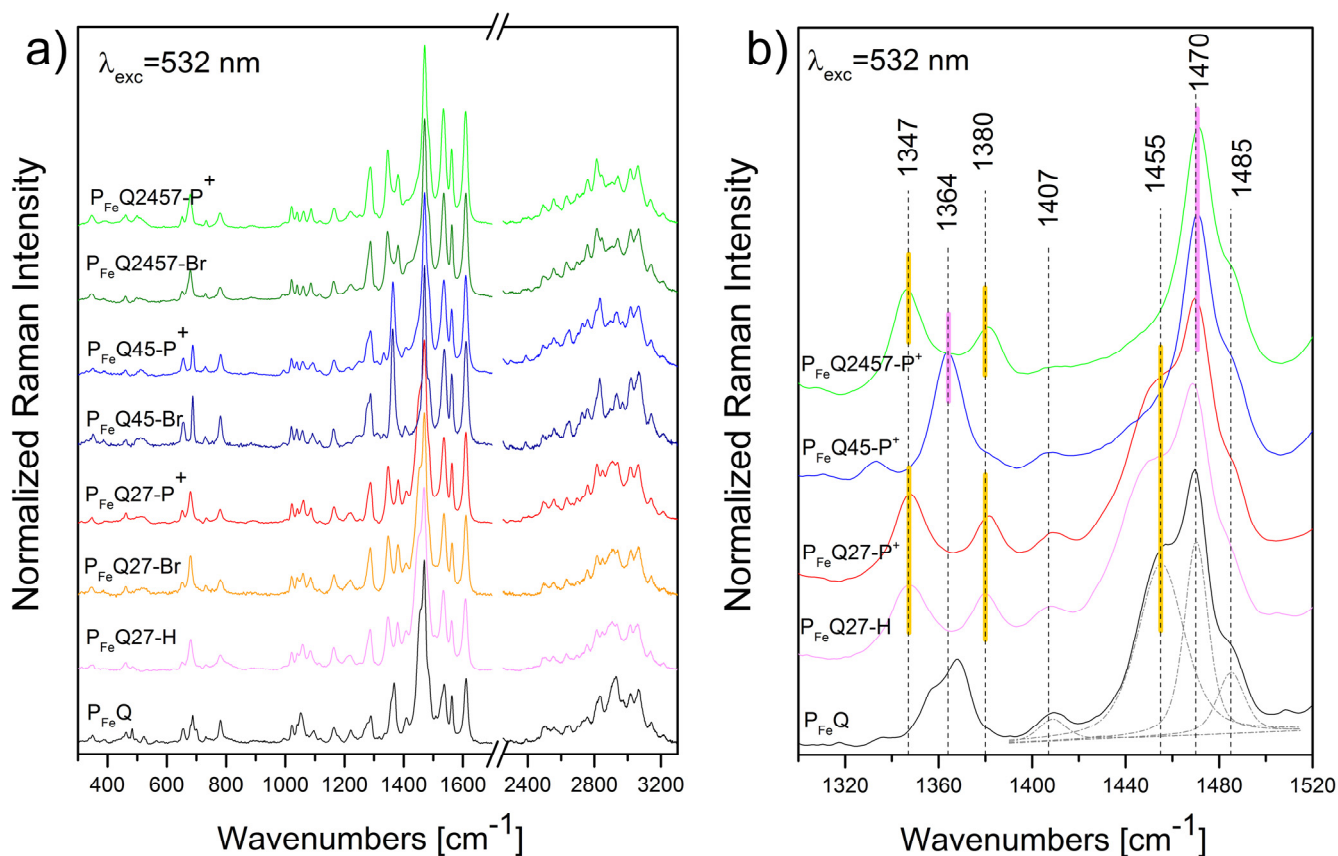

**Figure S6.** Off-resonance Raman spectra of Fe-polymers at  $\lambda_{\text{exc}} = 532$  nm (a) and deconvolution of spectra (b).

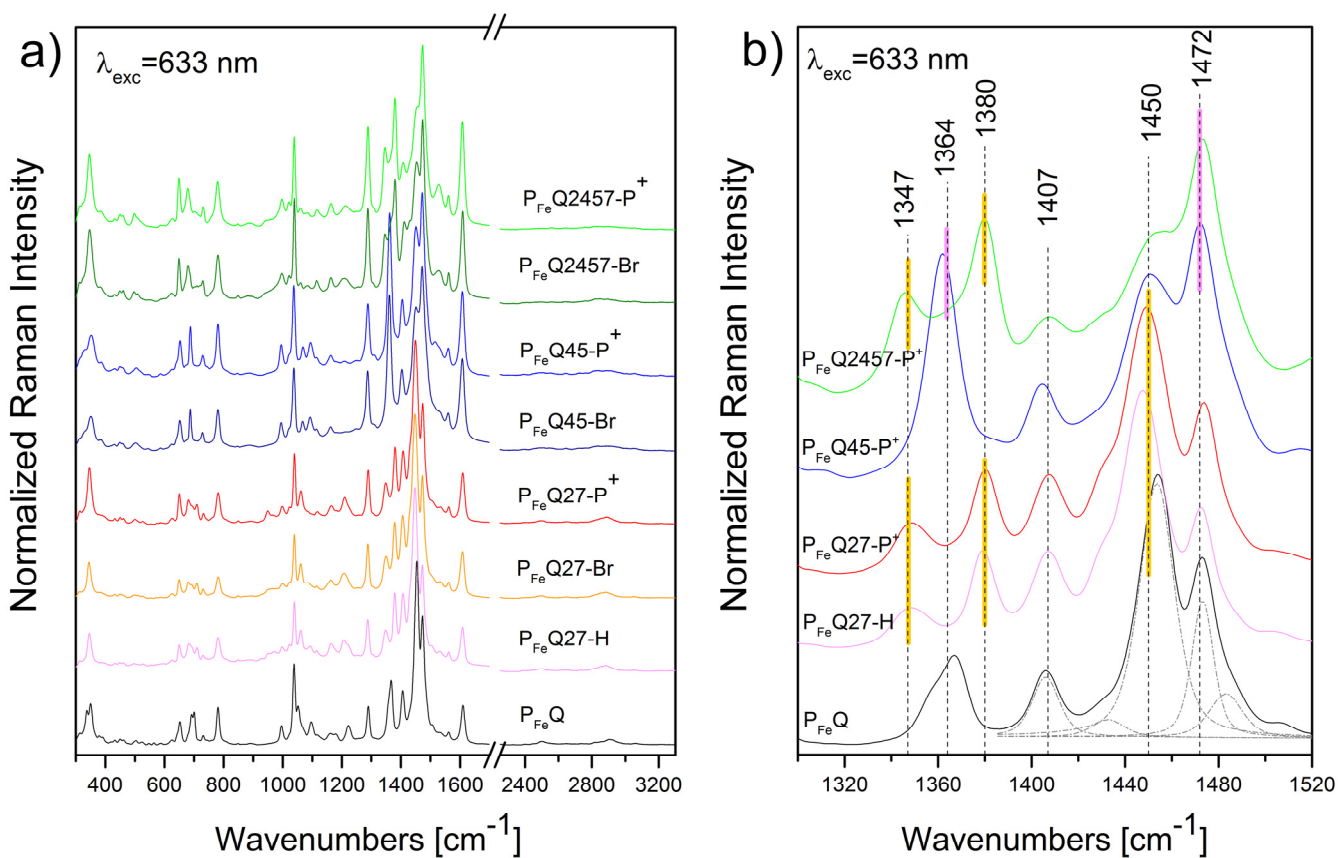

**Figure S7.** Off-resonance Raman spectra of Fe-polymers at  $\lambda_{\text{exc}} = 633$  nm (a) and deconvolution of spectra (b).

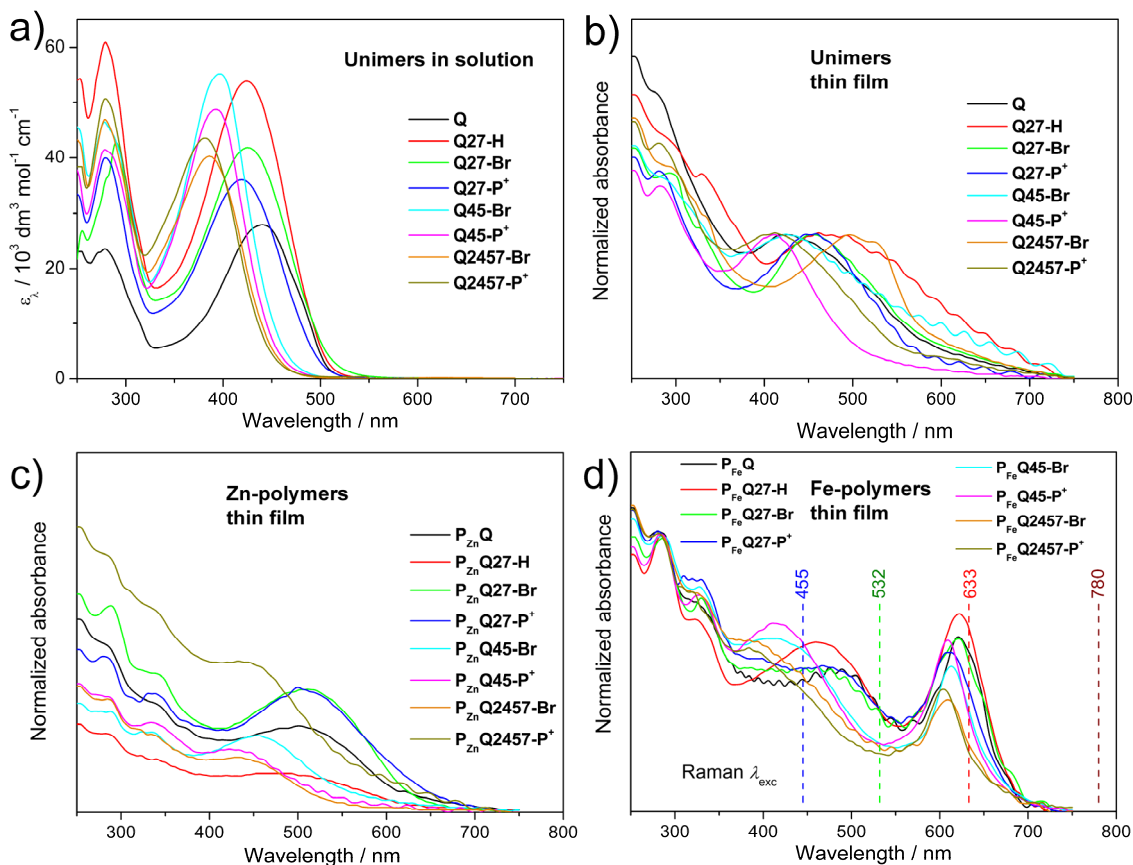

**Figure S8.** UV/vis spectra of prepared unimers and polymers.

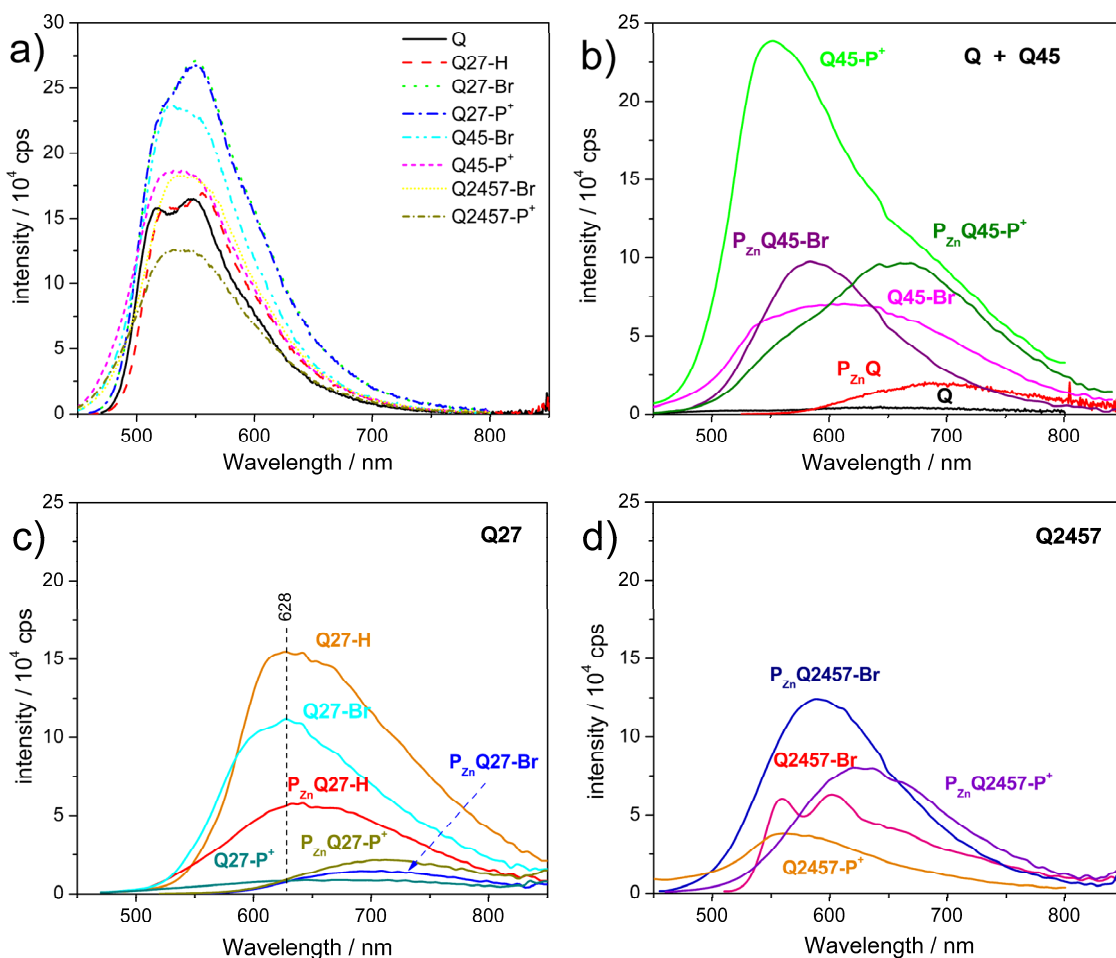

**Figure S9.** Luminescence spectra of prepared unimers in solution (a) and unimers and Zn-polymers in thin film (b-d).

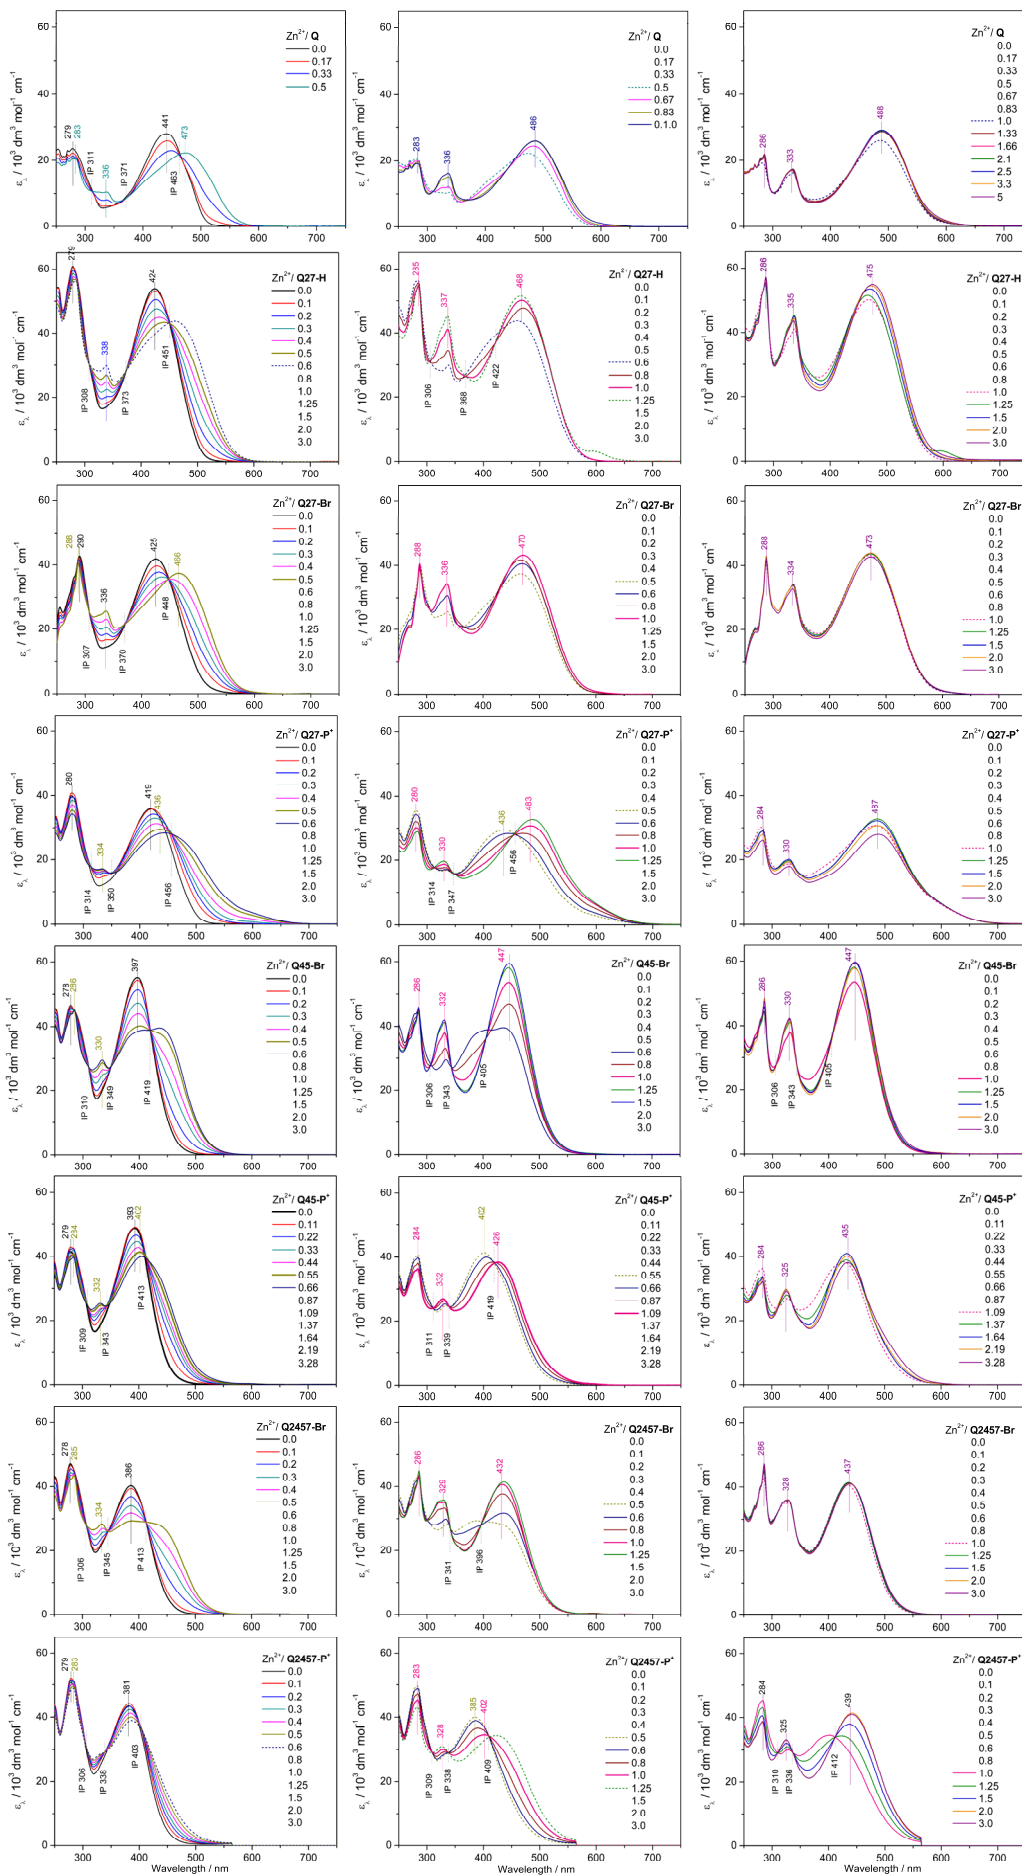

**Figure S10.** Complete set of UV/vis spectra accompanying the titration of non-ionic and ionic unimers with  $Zn^{2+}$  ions. Initial unimer concentration  $2 \cdot 10^{-5} M$  in chloroform/acetonitrile (non-ionic species) or methanol (ionic unimers), room temperature. Each column depicts the particular stage of assembling.

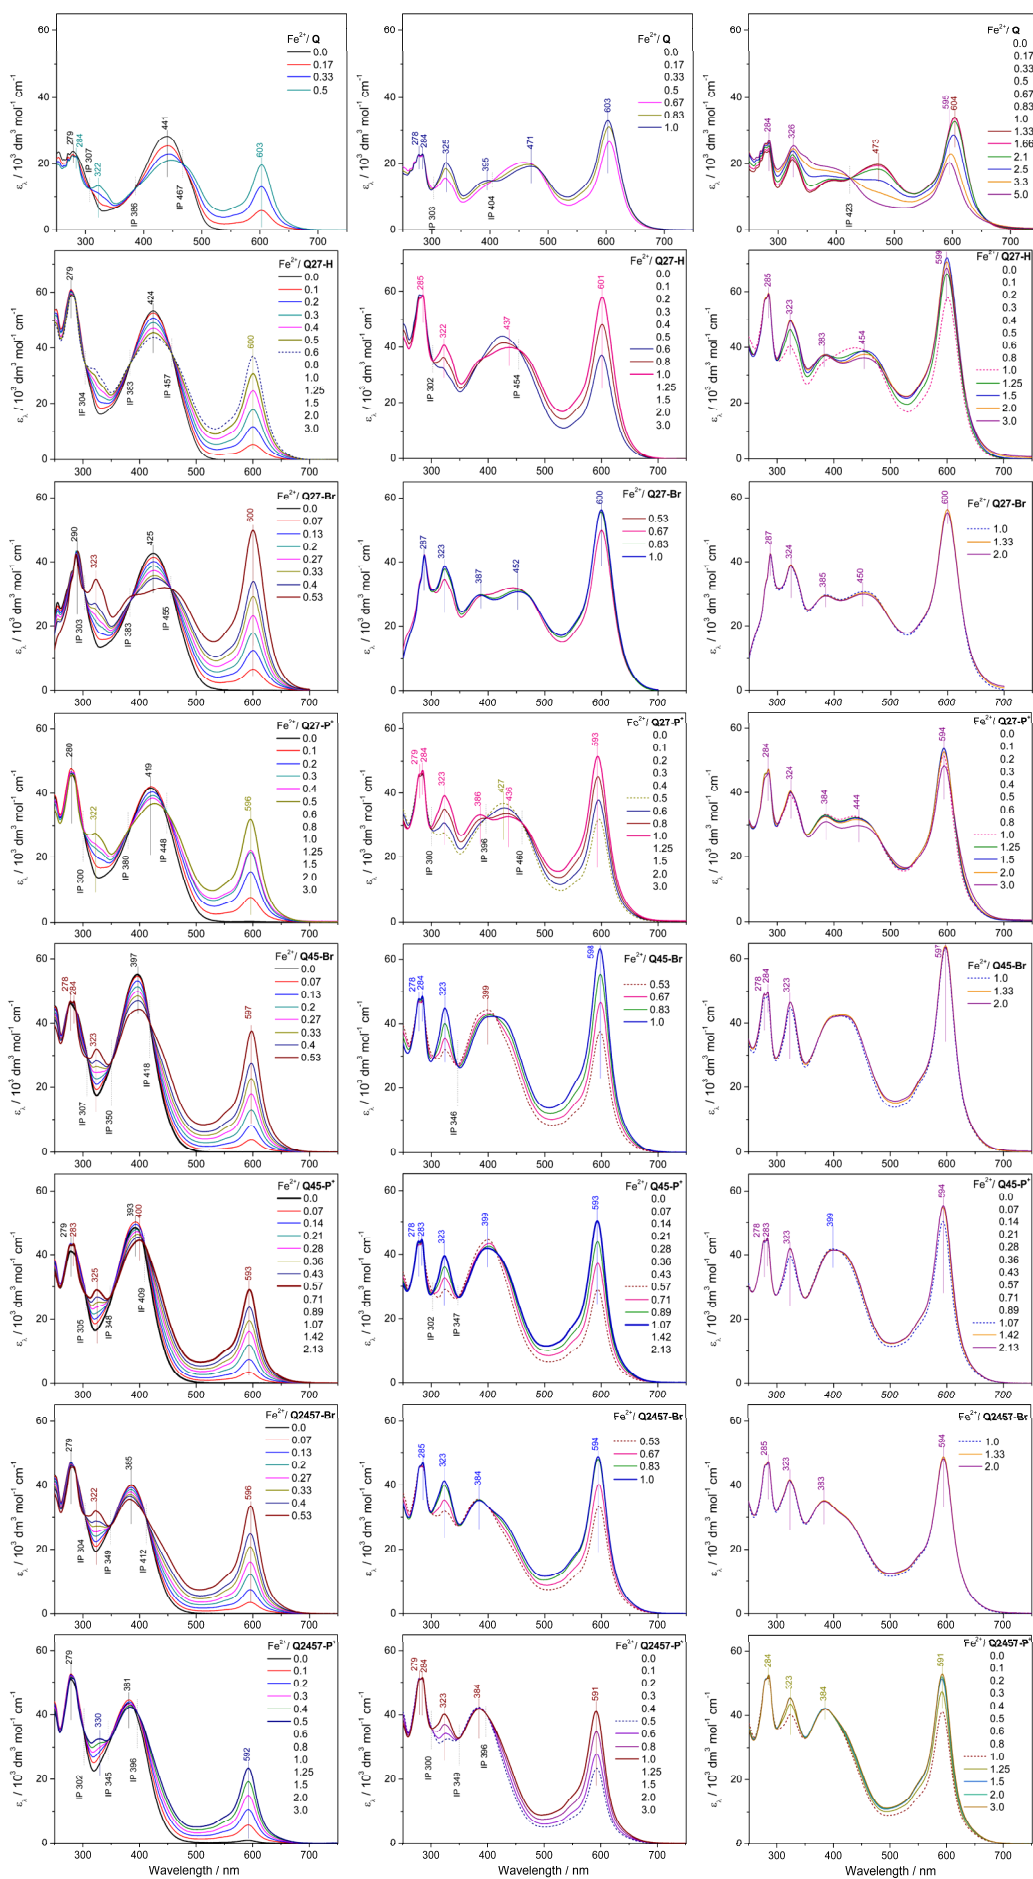

**Figure S11.** Complete set of UV/vis spectra accompanying the titration of non-ionic and ionic unimers with  $\text{Fe}^{2+}$  ions. Initial unimer concentration  $2 \cdot 10^{-5} \text{M}$  in chloroform/acetonitrile (non-ionic species) or methanol (ionic unimers), room temperature. Each column depicts the particular stage of assembling.

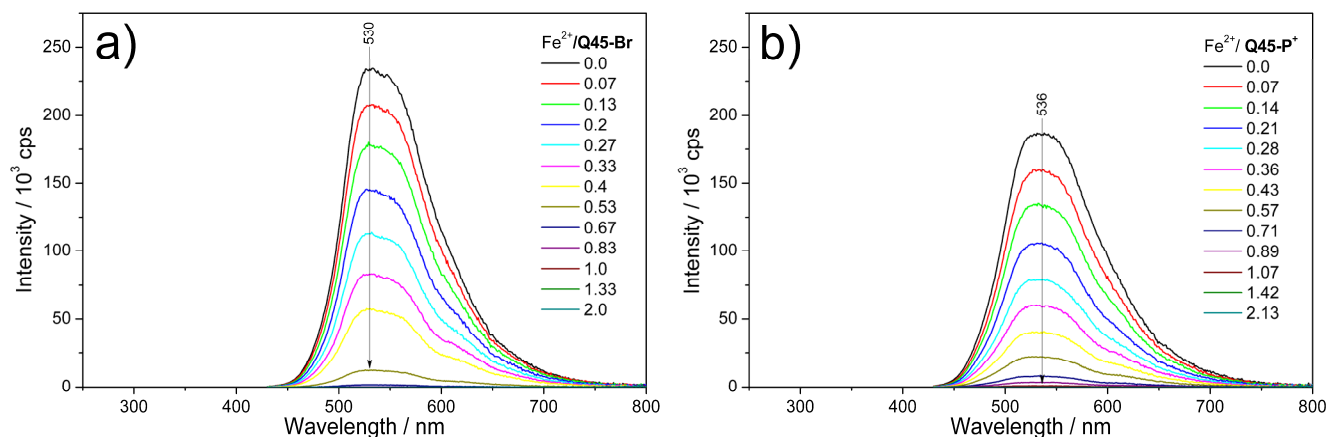

**Figure S12.** Changes in photoluminescence spectra accompanying titration of unimers **Q45-Br** (a) and **Q45-P<sup>+</sup>** (b) with  $\text{Fe}^{2+}$  in chloroform/acetonitrile (a) or methanol (b).

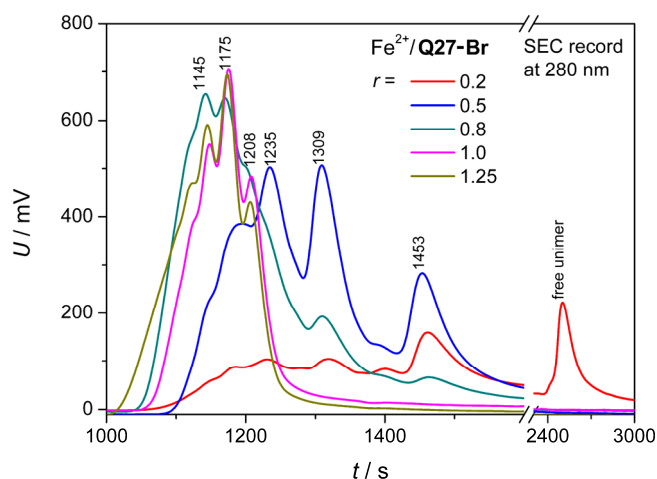

**Figure S13.** The SEC records of the  $\text{Fe}^{2+}/\text{Q27-Br}$  systems of different composition.

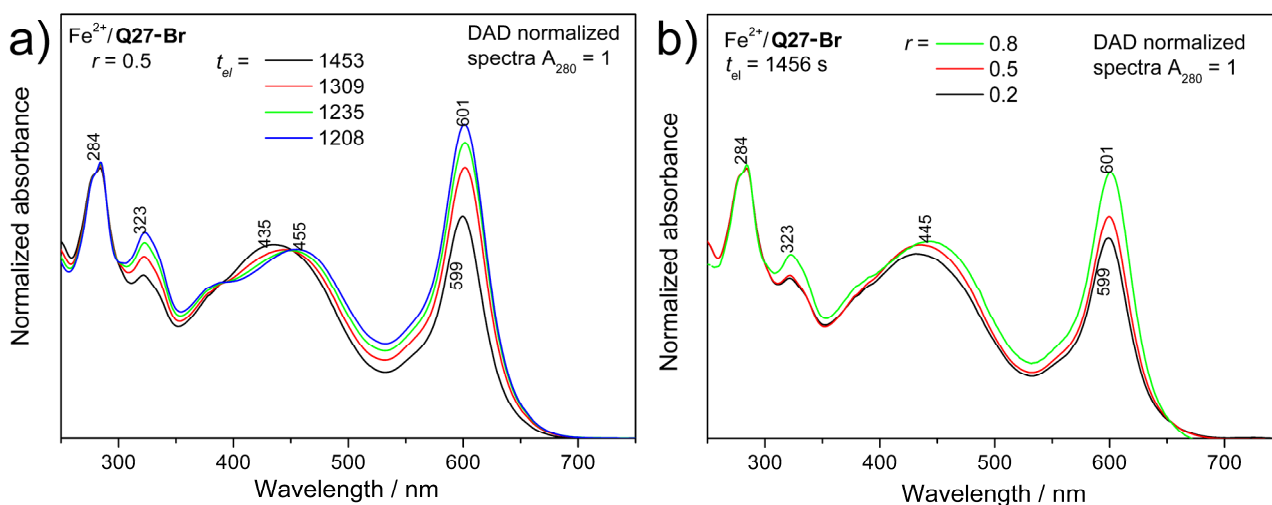

**Figure S14.** The DAD spectra at different elution time  $t_{\text{el}}$  (a) and the UV/vis spectra of SEC fractions ( $t_{\text{el}} = 1456$  s) of  $\text{Fe}^{2+} / \text{Q27-Br}$  systems of different composition (b).



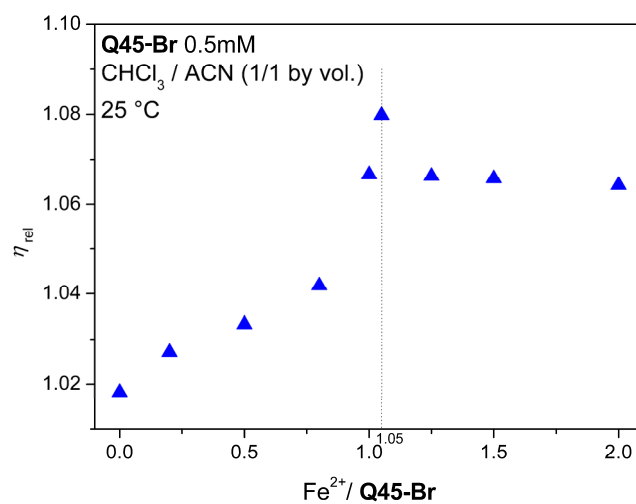

**Figure S15.** Relative viscosity of solution of the system Fe<sup>2+</sup>/Q45-Br as a function of composition.

**Table S1.** The photoluminescence maxima,  $\lambda_F$ , in solution and in thin film, photoluminescence quantum yield,  $\phi$ , and lifetime of excited states,  $\tau$ . Solvent: methanol for ionic unimers and polymers (suffix -P<sup>+</sup>); acetonitrile/chloroform (1/1 by vol.) for all the other unimers and polymers.

| Sample                                   | $\lambda_F$ , nm ( $\phi$ , %) |              | $\tau$ , ns              |                                        |
|------------------------------------------|--------------------------------|--------------|--------------------------|----------------------------------------|
|                                          | solution                       | film         | solution                 | film                                   |
| Unimers                                  |                                |              |                          |                                        |
| <b>Q</b>                                 | 514,546 (30%)                  | 645 (<1%)    | 0.79 (100%)              | 0.24 (35%)<br>0.98 (49%)<br>3.71 (16%) |
| <b>Q27-H</b>                             | 554 (26%)                      | 630 (1%)     | 0.62 (94%)<br>1.53 (6%)  | 0.15 (56%)<br>0.51 (38%)<br>1.84 (6%)  |
| <b>Q27-Br</b>                            | 554 (31%)                      | 630 (1%)     | 0.57 (85%)<br>1.20 (15%) | 0.13 (54%)<br>0.50 (36%)<br>1.98 (10%) |
| <b>Q27-P<sup>+</sup></b>                 | 550 (18%)                      | ~650 (<1%)   | 0.69 (100%)              | 0.15 (35%)<br>0.83 (43%)<br>2.54 (22%) |
| <b>Q45-Br</b>                            | 530 (14%)                      | 610 (1%)     | 0.43 (9%)<br>0.55 (91%)  | 0.18 (51%)<br>0.75 (39%)<br>3.82 (10%) |
| <b>Q45-P<sup>+</sup></b>                 | 536 (11%)                      | 550 (1%)     | 0.31 (33%)<br>0.57 (67%) | 0.08 (62%)<br>0.40 (30%)<br>2.27 (8%)  |
| <b>Q2457-Br</b>                          | 536 (14%)                      | 560,603 (3%) | 0.37 (44%)<br>0.50 (56%) | 0.07 (79%)<br>0.42 (16%)<br>1.84 (5%)  |
| <b>Q2457-P<sup>+</sup></b>               | 536 (10%)                      | 560 (1%)     | 0.39 (57%)<br>0.56 (43%) | 0.07 (74%)<br>0.39 (22%)<br>1.84 (4%)  |
| Zn-polymers                              |                                |              |                          |                                        |
| <b>P<sub>Zn</sub>Q</b>                   | 656                            | ~690 (1%)    |                          | 0.27 (53%)<br>0.92 (34%)<br>2.51 (13%) |
| <b>P<sub>Zn</sub>Q27-H</b>               | 673                            | ~640 (2%)    |                          | 0.18 (41%)<br>0.91 (44%)<br>3.54 (15%) |
| <b>P<sub>Zn</sub>Q27-Br</b>              | 675                            | ~710 (1%)    |                          | 0.16 (57%)<br>0.72 (36%)<br>3.05 (7%)  |
| <b>P<sub>Zn</sub>Q27-P<sup>+</sup></b>   | 550                            | ~705 (<1%)   |                          | 0.11 (47%)<br>0.54 (42%)<br>1.92 (11%) |
| <b>P<sub>Zn</sub>Q45-Br</b>              | 673                            | 585 (3%)     |                          | 0.21 (45%)<br>0.98 (39%)<br>3.63 (16%) |
| <b>P<sub>Zn</sub>Q45-P<sup>+</sup></b>   | 536                            | 660 (1%)     |                          | 0.06 (79%)<br>0.29 (17%)<br>1.98 (4%)  |
| <b>P<sub>Zn</sub>Q2457-Br</b>            | 668                            | 590 (3%)     |                          | 0.15 (43%)<br>0.71 (42%)<br>3.24 (15%) |
| <b>P<sub>Zn</sub>Q2457-P<sup>+</sup></b> | 552                            | 625 (1%)     |                          | 0.15 (56%)<br>0.56 (36%)<br>2.05 (8%)  |
